# Supplementary material for: Pressure effects on the anomalous thermal transport and anharmonic lattice dynamics of CsX (X = Cl, Br, and I)
Source: Royal Society of Chemistry journal article supplement (doi:10.1039/d2cp05308j), 2022-01-01
Supplement: d2cp05308j1.pdf [file d2cp05308j1.pdf]

# Pressure effects on the anomalous thermal transport and anharmonic lattice dynamics of CsX (X = Cl, Br, I)

Shasha Li<sup>a</sup>, Zezhu Zeng<sup>b</sup>, Yong Pu<sup>a,c,1\*</sup> and Yue Chen<sup>b,2\*</sup>

<sup>a</sup> School of Science, Nanjing University of Posts and Telecommunications, Nanjing, 210023, China

<sup>b</sup> Department of Mechanical Engineering, The University of Hong Kong, Pokfulam Road, Hong Kong SAR, China

<sup>c</sup> New Energy Technology Engineering Laboratory of Jiangsu Province, Nanjing University of Posts and Telecommunications, Nanjing, 210023, China

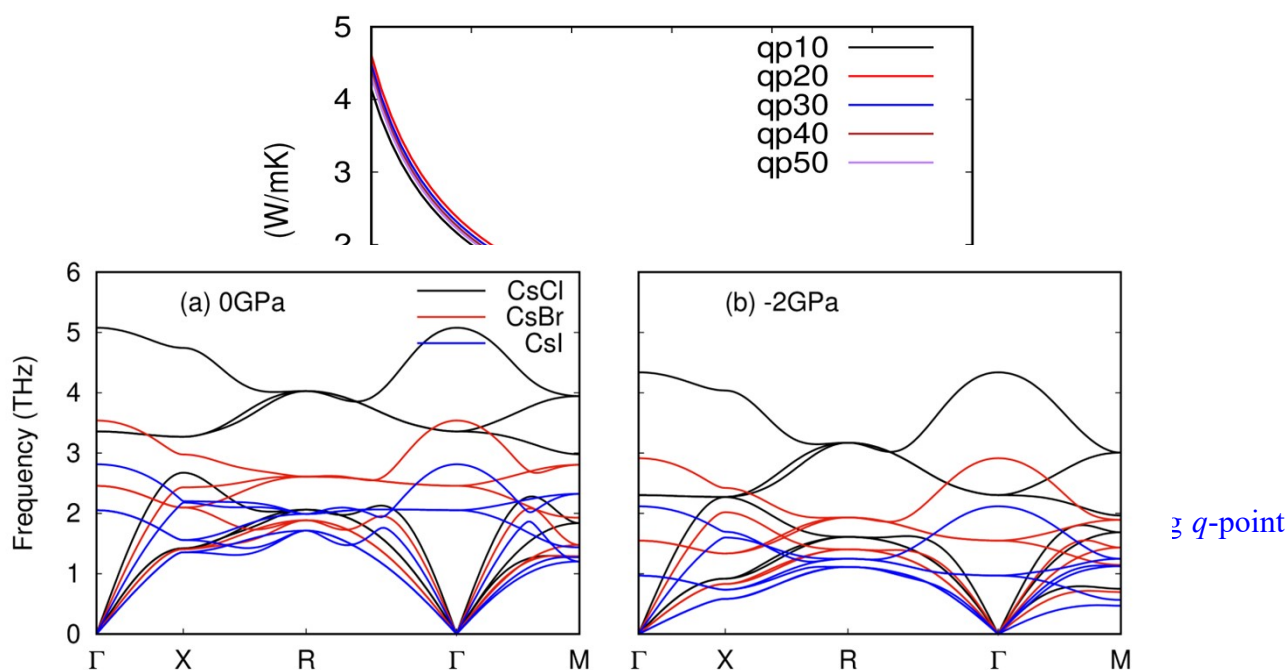

Fig. S2. Phonon dispersions of CsCl, CsBr and CsI calculated at (a) 0 and (b) -2 GPa.

<sup>1</sup> \* Corresponding author: puyong@njupt.edu.cn

<sup>2</sup> \* Corresponding author: yuechen@hku.hk

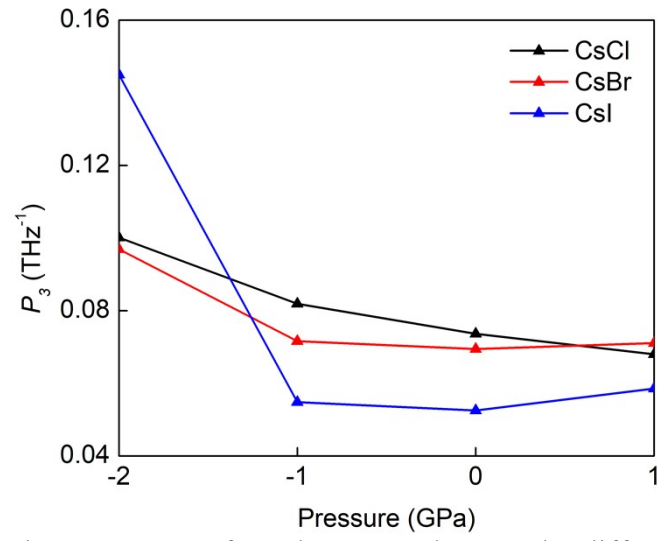

Fig. s3. Total scattering phase space  $P_3$  of CsCl, CsBr and CsI under different hydrostatic pressures.
